# Supplementary material for: Efficient thermal- and photocatalysts made of Au nanoparticles on MgAl-layered double hydroxides for energy and environmental applications
Source: Royal Society of Chemistry journal article supplement (doi:10.1039/c9cp04445k), 2019-01-01
Supplement: c9cp04445k1.pdf [file c9cp04445k1.pdf]

## Electronic Supplementary Information

### Efficient thermal- and photocatalysts made of Au nanoparticles on MgAl-layered double hydroxides for energy and environmental applications

Hao Zhou <sup>ab</sup> and Yanhui Zhang <sup>\*ab</sup>

<sup>a</sup> College of Chemistry, Chemical Engineering and Environment, Fujian Province Key Laboratory of Morden Analytical Science and Separation Technology, Minnan Normal University, Zhangzhou, 363000, P. R. China

<sup>b</sup> Fujian Province Key Laboratory of Ecology-Toxicological Effect & Control for Emerging Contaminants, Putian University, Putian, 351100, P. R. China

\*To whom correspondence should be addressed. E-mail Address: [zhangyh@mnnu.edu.cn](mailto:zhangyh@mnnu.edu.cn)

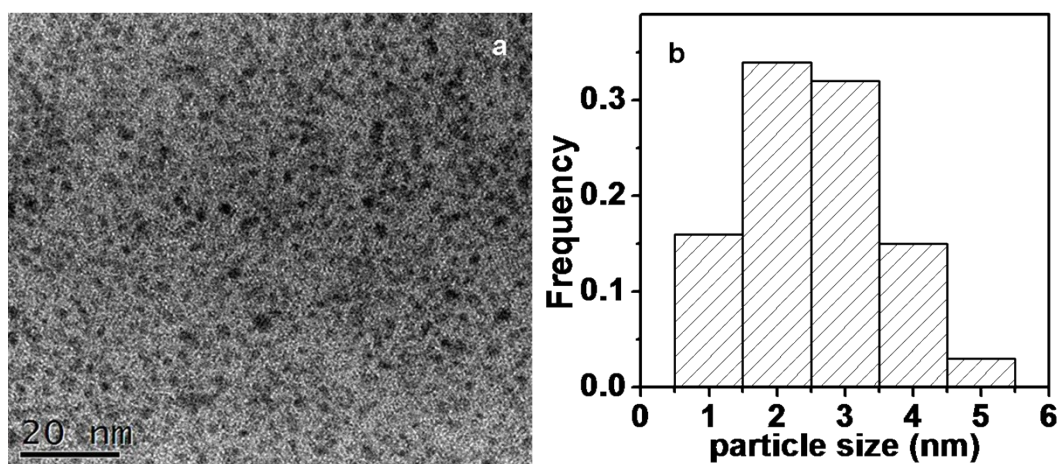

**Fig. S1.** TEM images of PVP@Au colloids (a); size distribution of Au particles in PVP@Au colloids (b).

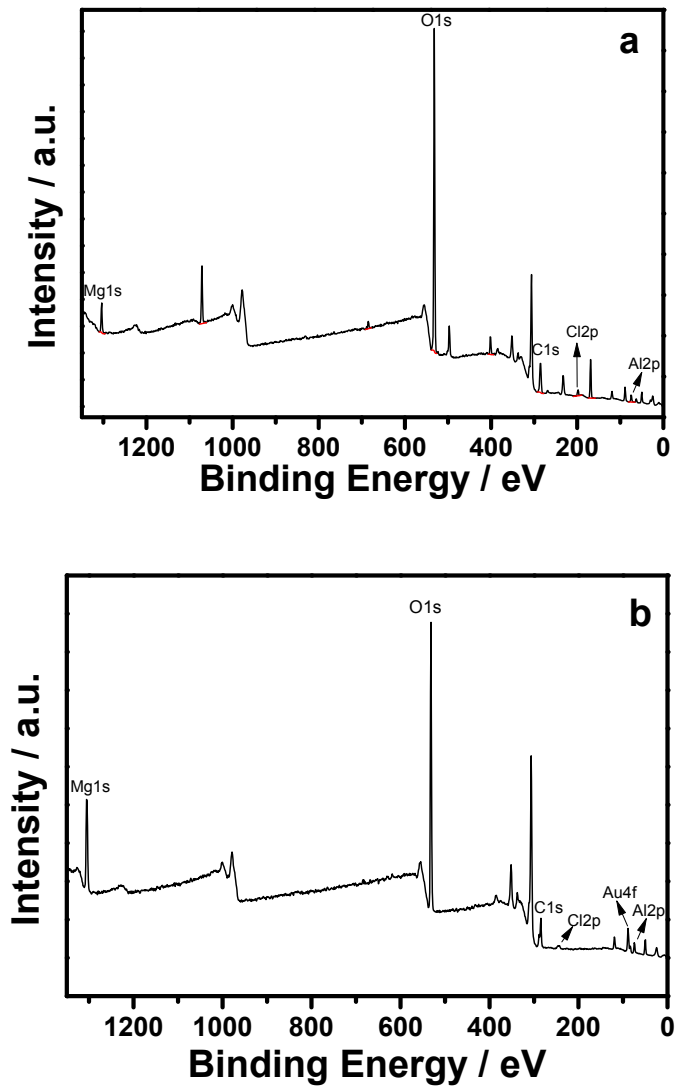

Fig. S2. XPS survey spectrum of MgAl-LDHs (a) and Au/MgAl-LDHs (b).

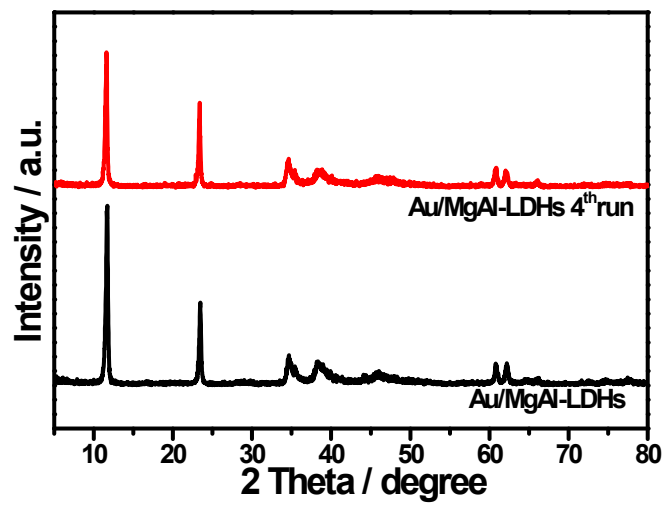

Fig. S3. XRD patterns of Au/MgAl-LDHs and Au/MgAl-LDHs 4<sup>th</sup> run.
